# Supplementary material
Source: Springer Nature journal article supplement (https://www.springermedizin.de/resource/supplementary/12936_2013_2791_MOESM5_ESM.pdf/9544246)

### Age distribution of *P. falciparum* infection divided into DNA load

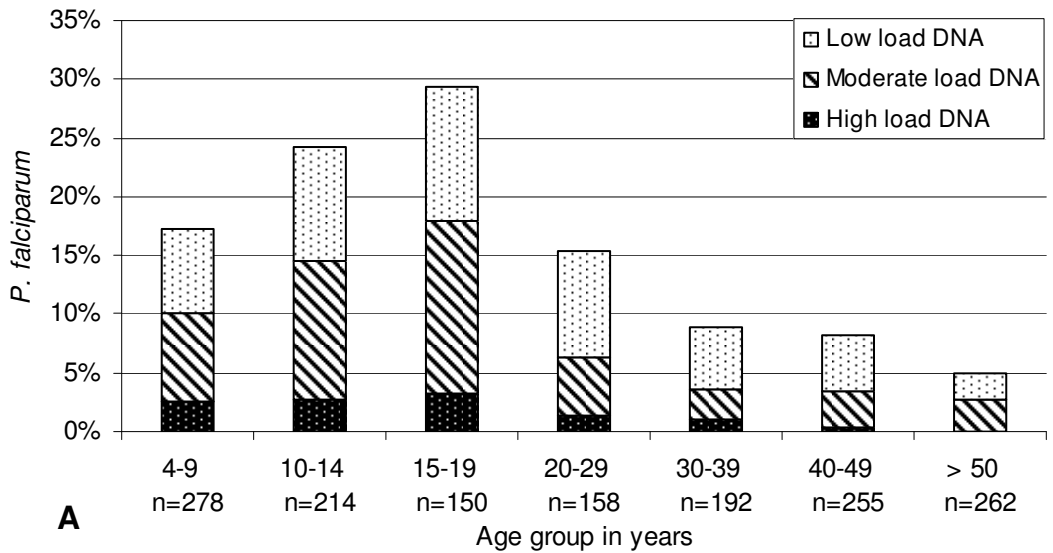

### Age distribution of *P. vivax* infection divided into DNA load

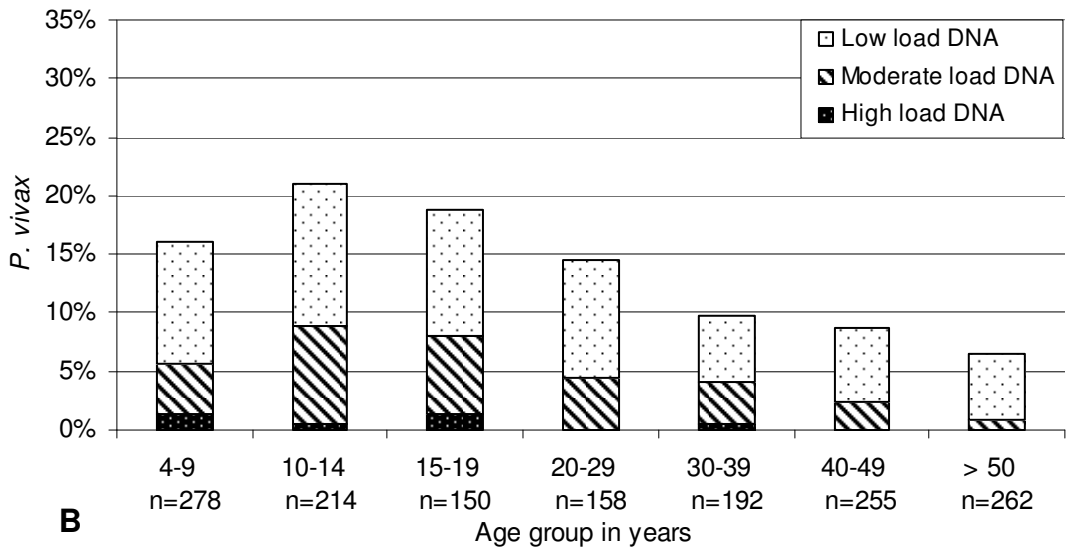

Supplement: MOESM5 [file 9544246]
